# Supplementary material for: Simple reverse genetics systems for Asian and African Zika viruses
Source: PubMed Central journal article supplement (PMC5171905; doi:10.1038/srep39384), 2016-12-19
Supplement: srep39384-s1.pdf [file srep39384-s1.pdf]

## Supplementary Information

### Simple reverse genetics systems for Asian and African Zika viruses

Thérèse Atieh<sup>1</sup>, Cécile Baronti<sup>1</sup>, Xavier de Lamballerie<sup>1,2</sup> and Antoine Nougairède<sup>1,2,\*</sup>

<sup>1</sup> UMR "Emergence des Pathologies Virales" (EPV: Aix-Marseille university - IRD 190 - Inserm 1207 - EHESP),  
Marseille, 13385, France

<sup>2</sup> Institut hospitalo-universitaire Méditerranée-Infection, Marseille, 13385, France

**Supplementary Table S1: Primers used for the amplification of the different DNA fragments**

| Strain  | DNA fragment | Primer Forward           | Position* | Primer Reverse         | Position* |
|---------|--------------|--------------------------|-----------|------------------------|-----------|
| PF/MART | I            | CACCCAAGTATCTTCAGCATCT   | ¶         | GCAGCACCATTCTCGATCACC  | 3407-3428 |
|         | II           | GAAACATGTGGAACAAGAGGACCA | 3354-3377 | GAAGCTCCAGCCAAGTAACTTC | 7600-7621 |
|         | III          | GTAAGTGAAGTCTCTACAGCCA   | 7553-7575 | CTCAGGGTCAATGCCAGCGCTT | £         |
| DAK     | I            | CACCCAAGTATCTTCAGCATCT   | ¶         | GCAGCACCATTCTCTATGACC  | 3407-3428 |
|         | II           | CACGTGGAGGAGACATGCGGAAC  | 3345-3367 | GTGTAAATAAGGGAAGCCCTGC | 7611-7633 |
|         | III          | GTAAGTGAAGTCTCCACAGCCA   | 7553-7575 | CTCAGGGTCAATGCCAGCGCTT | £         |

Primers located respectively at the 5' and 3' terminus of the pCMV (¶) and the HDR/SV40pA (£).

\* All positions based on complete PF strain sequence.

**Supplementary Note S1: Nucleotide sequence of the DNA fragments used for the ISA procedure**

**PF-I**

CACCCAAGTATCTTCAGCATCTTCAATATTGGCCATTAGCCATATTATTCATTGGTTATATAGCATAAATCAATAT  
TGGCTATTGGCCATTGCATACGTTGTATCTATATCATAAATATGTACATTTATATTGGCTCATGTCCAATATGACCGCC  
ATGTTGGCATTGATTATTGACTAGTTATTAATAGTAATCAATTACGGGGTCATTAGTTCATAGCCCATATGGAGT  
TCCCGTTACATAAAGTACGGTAAATGGCCCGCTGGCTGACCGCCCAACGACCCCGCCATTGACGTCAATAAAT  
GACGTATGTTCCCATAGTAACGCCAATAGGGACTTTCCATTGACGTCAATGGGTGGAGTATTTACGGTAAACTGCC  
CACTTGGCAGTACATCAAGTGTATCATATGCCAAGTCCGCCCTATTGACGTCAATGACGGTAAATGGCCCGCT  
GGCATTATGCCAGTACATGACCTTACGGGACTTTCCACTTGGCAGTACATCTACGTATTAGTCATCGCTATTACC  
ATGGTGATGCGGTTTTGGCAGTACACCAATGGGCGTGGATAGCGGTTTTGACTCACGGGGATTTCCAAGTCTCCACC  
CCATTGACGTCAATGGGAGTTTTGTTTTGGCACAAAATCAACGGGACTTTCCAAAATGTCGTAATAACCCCGCCCC  
GTTGACGCAAATGGGCGTAGGCGTGTACGGTGGGAGGTCTATATAAGCAGAGCTCGTTTAGTGAACCGAGTTGTT  
GATCTGTGTGAATCAGACTGCGACAGTTCGAGTTTGAAGCGAAAGCTAGCAACAGTATCAACAGTTTTATTTGG  
ATTTGAAACGAGAGTTTCTGGTCATGAAAAACCAAAAAAGAAATCCGGAGGATTCCGGATTGTCATATGCTAA  
AACGCGGAGTAGCCCGTGTGAGCCCCTTGGGGGCTTGAAGAGGCTGCCAGCCGACTTCTGCTGGGTCATGGGCC  
CATCAGGATGGTCTTGGCGATTCTAGCCTTTTTGAGATTACGGCAATCAAGCCATCACTGGGTCTCATCAATAGAT  
GGGGTTCAGTGGGGAAGAGGCTATGGAAATAATAAAGAAGTTCAAGAAAGATCTGGCTGCCATGCTGAGAA  
TAATCAATGCTAGGAAGGAGAAGAAGAGACGAGGCGCAGATACTAGTGTGCGAATTGTTGGCCTCTGCTGACCA  
CAGCTATGGCAGCGGAGGTCAGTACGTGGGAGTGCATACTATATGACTTGGACAGAAACGACGCTGGGGAGG  
CCATATCTTTTCCAACCACATTGGGGATGAATAAGTGTATATACAGATCATGGATCTTGGACACATGTGTGATGCC  
ACCATGAGCTATGAATGCCCTATGCTGGATGAGGGGGTGAACACAGATGACGTGATTGTTGGTGAACACGACGT  
CAACTTGGGTTGTGTACGGAACCTGCCATCACAAAAAGGTGAAGCACGGAGATCTAGAAGAGCTGTGACGCTCC  
CCTCCATTCCACTAGGAAGCTGCAAACGCGTTCGCAAACCTGGTTGGAATCAAGAGAATACAAAAGCACTTGAT  
TAGAGTCGAAAATTGGATATTCAGGAACCTGGCTTCGCGTTAGCAGCAGCTGCCATCGCTTGGCTTTTGGGAAGC  
TCAACGAGCCAAAAGTCATATACTTGGTCATGATACTGCTGATTGCCCCGGCATAACAGCATCAGGTGCATAGGAG  
TCAGCAATAGGGACTTTGTGGAAGGTATGTCAGGTGGGACTTGGGTTGATGTTGTCTTGGAACATGGAGTTGTGT  
CACCGTAATGGCACAGGACAAACCGACTGTCGACATAGAGCTGGTTACAACAACAGTCAGCAACATGGCGGAGGT  
AAGATCCTACTGCTATGAGGCATCAATATCGGACATGGCTTCGGACAGCCGCTGCCAACACAAGGTGAAGCCTAC  
CTTGACAAGCAATCAGACACTCAATATGCTGCAAAAAGACGTTAGTGGACAGAGGCTGGGGAAATGGATGTGGA  
CTTTTGGCAAAGGGAGCCTGGTGACATGCGCTAAGTTTGCATGCTCCAAGAAAATGACCGGGAAGAGCATCCAGC

CAGAGAATCTGGAGTACCGGATAATGCTGTCAGTTCATGGCTCCCAGCACAGTGGGATGATCGTTAATGACACAGG  
ACATGAAACTGATGAGAATAGAGCGAAGGTTGAGATAACGCCAATTACCAAGAGCCGAAGCCACCTGGGGGG  
TTTTGGAAGCCTAGGACTTGATTGTGAACCGAGGACAGGCCTTGACTTTTCAGATTTGTATTACTTGGACTATGAATA  
ACAAGCACTGGTTGGTTTACAAGGAGTGGTTCCACGACATTCATTACCTTGGCACGCTGGGGCAGACACCCGGAAC  
TCCACACTGGAACAACAAGAAGCACTGGTAGAGTTCAAGGACGCACATGCCAAAAGGCAAACTGTCGTGGTTCT  
AGGGAGTCAAGAAGGAGCAGTTCACACGGCCCTTGCTGGAGCTCTGGAGGCTGAGATGGATGGTGCAAAGGGAAG  
GCTGTCCCTGGCCACTTGAATGTGCCTGAAAATGGATAAACTTAGATTGAAGGGCGTGCATACTCCTTGTGTA  
CCGACAGCTTACATTACCAAGATCCCCGGCTGAAACACTGCACGGGACAGTCACAGTGGAGGTACAGTACGCAG  
GGACAGATGGACCTTGCAAGGTTCCAGCTCAGATGGCGGTGGACATGCAAACCTTGACCCAGTTGGGAGGTTGAT  
AACCGCTAACCCGTAATCACTGAAAGCACTGAGAACTCTAAGATGATGCTGGAACCTTGATCCACCATTGGGGAC  
TCTTACATTGTCATAGGAGTCGGGGAGAAGAAGATCACCCACCACTGGCACAGGAGTGGCAGCACCATTGGAAAA  
GCATTTGAAGCCACTGTGAGAGGTGCCAAGAGAATGGCAGTCTTGGGAGACACAGCCTGGGACTTTGGATCAGTTG  
GAGGCGCTCTCAACTCATTGGGCAAGGGCATCCATCAAATTTTTGGAGCAGCTTTCAAATCATTGTTTGGAGGAAT  
GTCCTGGTTCTCACAATTTCTCATTGGAACGTTGCTGATGTGGTTGGGTCTGAACACAAAGAATGGATCTATTTCCC  
TTATGTGCTTGGCCTTAGGGGGAGTGTGATCTTCTTATCCACAGCTGTCTCTGCTGATGTGGGGTGTCTGGTGGAC  
TTCTCAAAGAAGGAGACGAGATGCGGTACAGGGGTGTTCGTCTATAACGACGTTGAAGCCTGGAGGGACAGGTAC  
AAGTACCATCCTGACTCCCCCGTAGATTGGCAGCAGCAGTCAAGCAAGCCTGGGAAGATGGTATCTGTGGGATCT  
CCTCTGTTTCAAGAATGGAAAAATCATGTGGAGATCAGTAGAAGGGGAGCTCAACGCAATCCTGGAAGAGAATG  
GAGTTCAACTGACGGTCGTTGTGGGATCTGTA AAAAACCCCATGTGGAGAGGTCCACAGAGATTGCCCGTGCCTGT  
GAACGAGGTGCCCCACGGCTGGAAGGCTTGGGGGAAATCGTACTTCGTCAGAGCAGCAAAGACAAATAACAGCTT  
TGTCGTGGATGGTGACACTGAAGGAATGCCACTCAAACATAGAGCATGGAACAGCTTTCTTGTGGAGGATCAT  
GGTTTCGGGGTATTTACACTAGTGTCTGGCTCAAGGTTAGAGAATTATTATTAGAGTGTGATCCAGCCGCTTAT  
TGGAACAGCTGTTAAGGGAAAGGAGGCTGTACACAGTGTATCTAGGCTACTGGATTGAGAGTGAGAAGAATGACAC  
ATGGAGGCTGAAGAGGGCCATCTGATCGAGATGAAAACATGTGAATGGCCAAAGTCCACACATTGTGGACAGA  
TGGAATAGAAGAGAGTGATCTGATCATAACCAAGTCTTTAGCTGGGCCACTCAGCCATCACAATACCAGAGAGGGC  
TACAGGACCCAAATGAAAGGGCCATGGCACAGTGAAGAGCTTGAATTCGGTTTGGAGGAATGCCAGGCACTAAG  
GTCCACGTGGAGGAAACATGTGGAACAAGAGGACCATCTCTGAGATCAACCACTGCAAGCGGAAGGGTGTGCGAG  
GAATGGTGCTGC

**PF-II**

GAAACATGTGGAACAAGAGGACCATCTCTGAGATCAACCACTGCAAGCGGAAGGGTGTGAGGAATGGTGCTGC  
AGGGAGTGCACAATGCCCCACTGTCGTTCCGGGGCTAAAGATGGCTGTTGGTATGGAATGGAGATAAGGCCCAGG  
AAAGAACCAGAAAGTAACCTTAGTAAGGTCAATGGTACTGCAGGATCAACTGATCAGATGATGATCACTTCTCCCTG  
GAGTGCTTGTGATTCTGCTCATGGTGCAGGAAGGGCTGAAGAAGAGAATGACCACAAAGATCATATAAGCACAT  
CGATGGCAGTGTGGTAGCTATGATCCTGGGAGGATTTTCAATGAGTGACCTGGCTAAGCTTGCAATTTTGTGAGG  
TGCCACCTTCGCGGAAATGAACTGGAGGAGATGTAGCTCATCTGGCGCTGATAGCGGCATTCAAAGTCAGACCA  
GCGTTGCTGGTATCTTTCATCTCAGAGCTAATTGGACACCCCGTGAAGCATGCTGCTGGCCTTGGCCTCGTGTCT  
TTTGCAAACCTGCGATCTCCGCTTGGAAAGGCGACCTGATGGTTCTCATCAATGGTTTTGCTTTGGCCTGGTTGGCAA  
TACGAGCGATGGTTGTTCCACGCACTGATAACATCACCTTGGCAATCCTGGCTGCTCTGACACCACTGGCCCGGG  
CACACTGCTTGTGGCGTGGAGAGCAGGCCTTGCTACTTGGCGGGGGTTTATGCTCCTCTCTGAAAGGGAAAAGGC  
AGTGTGAAGAAGAACTTACCATTTGTCATGGCCCTGGGACTAACCGCTGTGAGGCTGGTCGACCCCATCAACGTGG  
TGGGACTGCTGTTGCTCACAAGGAGTGGGAAGCGGAGCTGGCCCCCTAGCGAAGTACTCACAGCTGTTGGCCTGAT  
ATGCGCATTGGCTGGAGGTTTCGCCAAGGCAGATATAGAGATGGCTGGGCCATGGCCGCGTGGTCTGCTAATT  
GTCAGTTACGTGGTCTCAGGAAAAGAGTGGGACATGTACATTGAAAGAGCAGGTGACATCACATGGGAAAAAGAT  
GCGGAAGTCACTGGAAACAGTCCCCGGCTCGATGTGGCGCTAGATGAGAGTGGTGATTTCTCCCTGGTGGAGGATG  
ACGGTCCCCCATGAGAGAGATCATACTCAAGGTGGTCTGTGATGACCATCTGTGGCATGAACCAATAGCCATACC  
CTTTCAGCTGGAGCGTGGTACGTATACGTGAAGACTGGA AAAAGGAGTGGTGCTCTATGGGATGTGCCTGCTCCC  
AAGGAAGTAAAAAAGGGGGAGACCACAGATGGAGTGTACAGAGTAATGACTCGTAGACTGCTAGGTTCAACACAA  
GTTGGAGTGGGAGTTATGCAAGAGGGGGTCTTTCACACTATGTGGCACGTCACAAAAGGATCCGCGCTGAGAAGC  
GGTGAAGGGAGACTTGATCCATACTGGGAGATGTCAAGCAGGATCTGGTGTACATACTGTGGTCCATGGAAGCTAG  
ATGCCGCTGGGACGGGCACAGCGAGGTGCAGCTCTTGGCCGTGCCCCCGGAGAGAGAGCGAGGAACATCCAGA  
CTCTGCCCGGAATATTTAAGACAAAAGGATGGGGACATTGGAGCGGTTGCGCTGGATTACCCAGCAGGAACCTCAGG  
ATCTCCAATCCTAGACAAGTGTGGGAGAGTGATAGGACTTTATGGCAATGGGGTCTGATCAAAAATGGGAGTTAT  
GTTAGTGCCATCACCAAGGGAGGAGGGAGGAAGAGACTCCTGTTGAGTGCTTCGAGCCTTCGATGCTGAAGAAG  
AAGCAGCTAACTGTCTTAGACTTGCATCCTGGAGCTGGGAAAACCAGGAGAGTTCTTCTGAAATAGTCCGTGAAG  
CCATAAAAACAAGACTCCGTA CTGTGATCTTAGCTCCAACCAGGGTTGTGCTGCTGAAATGGAGGAAGCCCTTAG  
AGGGCTTCCAGTGCGTTATATGACAACAGCAGTCAATGTACCCACTCTGGAACAGAAATCGTCGACTTAATGTGC

CATGCCACCTTCACTTCACGTCTACTACAGCCAATCAGAGTCCCCAACTATAATCTGTATATTATGGATGAGGCCCA  
CTTACAGATCCCCTCAAGTATAGCAGCAAGAGGATACATTTCAACAAGGGTTGAGATGGGCGAGGCGGCTGCCATC  
TTCATGACCGCCACGCCACCAGGAACCCGTGACGCATTTCCGGACTCCAACCTACCAATTATGGACACCCGAAGTGG  
AAGTCCCAGAGAGAGCCTGGAGCTCAGGCTTTGATTGGGTGACGGATCATTCTGGAAAAACAGTTTGGTTTGTTC  
AAGCGTGAGGAACGGCAATGAGATCGCAGCTTGTCTGACAAAGGCTGGAAAACGGGTCATACAGCTCAGCAGAAA  
GACTTTTGGAGACAGAGTTCCAGAAAACAAAACATCAAGAGTGGGACTTTGTCTGTGACAACTGACATTTAGAGATG  
GGCCCAACTTTAAAGCTGACCGTGTATAGATTCCAGGAGATGCCTAAAGCCGGTCACTTTGATGGCGAGAGAG  
TCATTCTGGCTGGACCCATGCCTGTACACATGCCAGCGCTGCCAGAGGAGGGGGGGCGCATAGGCAGGAATCCCAA  
CAAACCTGGAGATGAGTATCTGTATGGAGGTGGGTGCGCAGAGACTGACGAAGACCATGCACACTGGCTTGAAGC  
AAGAATGCTCCTTGACAATATTTACCTCCAAGATGGCCTCATAGCCTCGCTCTATCGACCTGAGGCCGACAAAGTA  
GCAGCCATTGAGGGAGAGTTCAAGCTTAGGACGGAGCAAAGGAAGACCTTTGTGGAACCTCATGAAAAGAGGAGAT  
CTTCTGTTTGGCTGGCCTATCAGGTTGCATCTGCCGGAATAACCTACACAGATAGAAGATGGTGTCTTTGATGGCAC  
GACCAACAACACCATAATGGAAGACAGTGTGCCGGCAGAGGTGTGGACCAGACACGGAGAGAAAAGAGTGTCTA  
AACCGAGGTGGATGGACGCCAGAGTTTGTTCAGATCATGCGGCCCTGAAGTCATTCAAGGAGTTTGGCCGTGGGAA  
AAGAGGAGCGGCTTTGGAGTGATGGAAGCCCTGGGAACACTGCCAGGACACATGACAGAGAGATTCCAGGAAGC  
CATTGACAACCTCGCTGTGCTCATGCGGGCAGAGACTGGAAGCAGGCCTTACAAAGCCGCGGGCCCAATTGCCG  
GAGACCCTAGAGACCATTATGCTTTTGGGGTTGCTGGGAACAGTCTCGCTGGGAATCTTTTTCGTCTTGATGAGGAA  
CAAGGGCATAGGGAAGATGGGCTTTGGAATGGTGACTCTTGGGGCCAGCGCATGGCTCATGTGGCTCTCGGAAATT  
GAGCCAGCCAGAATTGCATGTGTCTCATTGTTGTGTTCTATTGCTGGTGGTGTCTATACCTGAGCCAGAAAAGCA  
AAGATCTCCCCAGGACAACCAAATGGCAATCATCATATGGTAGCAGTAGGTCTTCTGGGCTTGATTACCGCCAA  
GAACTCGGATGGTTGGAGAGAACAAGAGTGACCTAAGCCATCTAATGGGAAGGAGAGAGGGGGGCAACCAT  
AGGATTTCAATGGACATTGACCTGCGGCCAGCCTCAGCTTGGGCCATCTATGCTGCCTTGACAACCTTTCATTACCC  
CAGCCGTCCAACATGCATTGACCACTTCATACAACAACAACACTACTCCTTAATGGCGATGGCCACGCAAGCTGGAGTGT  
GTTTGGTATGGGCAAAGGGATGCCATTCTACGCATGGGACTTTGGAGTCCCCTGCTAATGATAGTTGCTACTCA  
CAATTAACACCCCTGACCCTAATAGTGGCCATCATTTTGTCTGTGGCGCACTACATGTACTTGATCCCAGGGCTGCA  
GGCAGCAGCTGCGCGTGTGCCCAGAAGAGAACGGCAGTGGCATCATGAAGAACCCTGTTGTGGATGGAATAGT  
GGTGACTGACATTGACACAATGACAATTGACCCCCAAGTGGAGAAAAAGATGGGACAGGTGCTACTCATAGCAGT  
AGCCGTCTCCAGCGCCATACTGTGCGGACCGCTGGGGGTGGGGGAGGCTGGGGCCCTGATCACAGCGGCAAC  
TTCCACTTTGTGGGAAGGCTCTCCGAACAAGTACTGGAACCTCTACAGCCACTTCACTGTGTAACATTTTAGGG  
GAAGTACTTGGCTGGAGCTC

**PF-III**

GTACTGGAACCTCTACAGCCACTTCACTGTGTAACATTTTTAGGGGAAGTACTTGGCTGGAGCTTCTCTAATCT  
ACACAGTAACAAGAAACGCTGGCTTGGTCAAGAGACGTGGGGGTGGAACAGGAGAGACCCTGGGAGAGAAATGG  
AAGGCCCGCTTGAACCAGATGTCGGCCCTGGAGTTCTACTCCTACAAAAAGTCAGGCATCACCGAGGTGTGCAGAG  
AAGAGGCCCGCCGCGCCCTCAAGGACGGTGTGGCAACGGGAGGCCATGCTGTGTCCCGAGGAAGTGCAAAGCTGA  
GATGGTTGGTGGAGCGGGGATACCTGCAGCCCTATGGAAGGTCATTGATCTTGGATGTGGCAGAGGGGGCTGGA  
GTTACTACGCCGCCACCATCCGCAAAAGTTCAAGAAGTGAAAGGATACACAAAAGGAGGCCCTGGTCATGAAGAAC  
CCATGTTGGTGCAAAGCTATGGGTGGAACATAGTCCGTCTTAAGAGTGGGGTGGACGTCTTTCATATGGCGGCTGA  
GCCGTGTGACACGTTGCTGTGTGACATAGGTGAGTCATCATCTAGTCCCTGAAGTGGAGAAGCACGGACGCTCAGA  
GTCCTCTCCATGGTGGGGGATTGGCTTGAAAAAAGACCAGGAGCCTTTTGTATAAAAAGTGTGTGCCATACACCA  
GCCTATGATGGAACCCCTGGAGCGACTGCAGCGTAGGTATGGGGGAGGACTGGTCAGAGTCCACTCTCCCAGCA  
ACTTACACATGAGATGTACTGGGTCTCTGGAGCGAAAAGCAACACCATAAAAAAGTGTGTCCACCACGAGCCAGCT  
CCTCTTGGGGCGCATGGACGGGCCAGGAGGCCAGTAAAATATGAGGAGGATGTGAATCTCGGCTCTGGCACGCG  
GGCTGTGGTAAGCTGCGCTGAAGCTCCCAACATGAAGATCATTGGTAACCGCATTGAAAGGATCCGCAGTGAGCAC  
GCGGAAACGTGGTTCTTTGACGAGAACCACCCATATAGGACATGGGCTTACCATGGAAGCTATGAGGCCCCACAC  
AAGGGTCAGCGTCTCTCTAATAAACGGGGTTGTCAGGCTCCTGTCAAACCCTGGGATGTGGTGACTGGAGTCAC  
AGGAATAGCCATGACCGACACCACACCGTATGGTCAGCAAAGAGTTTTCAGGAAAAAGTGGACACTAGGGTGCC  
AGACCCCAAGAAGGCACTCGTCAGGTTATGAGCATGGTCTCTTCTGGTTGTGGAAAGAGCTAGGCAAACACAAA  
CGGCCACGAGTCTGTACCAAAGAAGAGTTCATCAACAAGGTTTCGTAGCAATGCAGCATTAGGGGCAATATTTGAA  
GAGGAAAAAGAGTGAAGACTGCAGTGGAAGCTGTGAACGATCCAAGGTTCTGGGCTCTAGTGGACAAGGAAAG  
AGAGCACCACTGAGAGGAGAGTGCCAGAGTTGTGTGTACAACATGATGGGAAAAAGAGAAAAGAAACAAGGGG  
AATTTGAAAGGCCAAGGGCAGCCGCGCCATCTGGTATATGTGGCTAGGGGCTAGATTTCTAGAGTTCGAAGCCCT  
TGGATTCTTGAACGAGGATCACTGGATGGGGAGAGAGAACTCAGGAGGTGGTGTGAAGGGCTGGGATTACAAAG  
ACTCGGATATGTCCTAGAAGAGATGAGTCCGATACCAGGAGGAAGGATGTATGCAGATGACACTGCTGGCTGGGA  
CACCCGCATCAGCAGGTTTGTCTGGAGAATGAAGCTTAATCACAACCAAATGGAGAAAAGGGCACAGGGCCTT  
GGCATTGGCCATAATCAAGTACACATACAAAACAAGTGGTAAAGGTCTTAGACCAGCTGAAAAAGGGAAGAC

AGTTATGGACATTATTTTCGAGACAAGACCAAAGGGGGAGCGGACAAGTTGTCACCTTACGCTCTTAACACATTTACC  
AACCTAGTGGTGCAACTCATTTCGGAATATGGAGGCTGAGGAAGTTCTAGAGATGCAAGACTTGTGGCTGCTGCGGA  
GGTCAGAGAAAAGTGACCAACTGGTTGCAGAGCAACGGATGGGATAGGCTCAAACGAATGGCAGTCAGTGGAGATG  
ATTGCGTTGTGAAGCAATTGATGATAGTTTTGCACATGCCCTCAGGTTCTTGAATGATATGGGAAAAGTTAGGAA  
GGACACACAAGAGTGGAAACCCCTCAACTGGATGGGACAACCTGGGAAGAAGTTCCGTTTTGCTCCCACCACTTCAAC  
AAGCTCCATCTCAAGGACGGGAGGTCATTGTGGTTCCCTGCCGCCACCAAGATGAACTGATTGGCCGGGCCCGCG  
TCTCTCCAGGGGCGGGATGGAGCATCCGGGAGACTGCTTGCCTAGCAAAAATCATATGCGCAAATGTGGCAGCTCCT  
TTATTTCCACAGAAGGGACCTCCGACTGATGGCCAATGCCATTTGTTTCATCTGTGCCAGTTGACTGGGTTCCAACCTG  
GGAGAACTACCTGGTCAATCCATGGAAAGGGAGAATGGATGACCACTGAAGACATGCTTGTGGTGTGGAACAGAG  
TGTGGATTGAGGAGAACGACCACATGGAAGACAAGACCCAGTTACGAAATGGACAGACATTCCCTATTTGGGAA  
AAAGGGAAAGACTTGTGGTGTGGATCTCTCATAGGGCACAGACCGCGCACCACCTGGGCTGAGAACATTAATAAACA  
CAGTCAACATGGTGCAGGATCATAGGTGATGAAGAAAAGTACATGGACTACCTATCCACCCAAGTTCGCTACTT  
GGGTGAAGAAGGTCTACACCTGGAGTGTGTAAGCACCAATCTTAGTGTGTGTCAGGCTGCTAGTCAGCCACAGC  
TTGGGAAAAGCTGTGCAGCTGTGACCCCCCAGGAGAAGCTGGGAAACCAAGCCTATAGTCAGGCCGAGAACGC  
CATGGCACGGAAGAAGCCATGCTGCCTGTGAGCCCCTCAGAGGACACTGAGTCAAAAAACCCACGCGCTTGGAG  
GCGCAGGATGGGAAAAGAAGGTGGCGACCTTCCCCACCTTCAATCTGGGGCCTGAACTGGAGATCAGCTGTGGA  
TCTCCAGAAGAGGGACTAGTGGTTAGAGGAGACCCCCGGAAAACGCAAAACAGCATATTGACGCTGGGAAAAGAC  
CAGAGACTCCATGAGTTTTCCACCACGCTGGCCGCCAGGCACAGATCGCCGAATAGCGGCGGCCGGTGTGGGGAAA  
TCCATGGGTCTGGCCGGCATGGTCCCAGCCTCCTCGCTGGCGCCGGCTGGGCAACATTCCGAGGGGACCGTCCCCT  
CGGTAATGGCGAATGGGACTCGCGACAGACATGATAAGATACATTGATGAGTTTGGACAAACCACAACCTAGAATG  
CAGTGAATAAATGCTTTATTTGTGAAATTAAGCGCTGGCATTGACCCCTGAG

**DAK-I**

CACCCAACTGATCTTCAGCATCTTCAATATTGGCCATTAGCCATATTATTCATTGGTTATATAGCATAAATCAATAT  
TGGCTATTGGCCATTGCATACGTTGTATCTATATCATAATATGTACATTTATATTGGCTCATGTCCAATATGACCGCC  
ATGTTGGCATTGATTATTGACTAGTTATTAATAGTAATCAATTACGGGGTCATTAGTTCATAGCCCATATATGGAGT  
TCCGCGTTACATAAATTACGGTAAATGGCCCGCTGGCTGACCGCCCAACGACCCCGCCATTGACGTCAATAAT  
GACGTATGTTCCCATAGTAACGCCAATAGGGACTTTCCATTGACGTCAATGGGTGGAGTATTTACGGTAAACTGCC  
CACTTGGCAGTACATCAAGTGTATCATATGCCAAGTCCGCCCTTATTGACGTCAATGACGGTAAATGGCCCGCT  
GGCATTATGCCCAGTACATGACCTTACGGGACTTTTCTACTTGGCAGTACATCTACGTATTAGTCATCGCTATTACC  
ATGGTGATGCGGTTTTGGCAGTACACCAATGGGCGTGGATAGCGGTTTGACTCACGGGGATTTCCAAGTCTCCACC  
CCATTGACGTCAATGGGAGTTTGTGTTTGGCACCAAAAATCAACGGGACTTTCCAAAATGTCGTAATAACCCCGCCCC  
GTTGACGCAAAATGGGCGTAGGCGTGTACGGTGGGAGGTCTATATAAGCAGAGCTCGTTTAGTGAACCGAGTTGTT  
GATCTGTGTGAATCAGACTGCGACAGTTCGAGTTTGAAGCGAGAGCTAACAACAGTATCAACAGGTTTAAATTTGGA  
TTTGAAACGAGAGTTTCTGGTCATGAAAAACCCAAAGAAGAAATCCGGAGGATTCCGGATTGTCAATATGCTAAA  
ACGCGGAGTAGCCCGTGTAAACCCCTTGGGGGTTTGAAGAGGCTGCCAGCCGGACTTCTGCTGGGCCATGGACCC  
ATCAGAATGGTTTTGGCGATACTAGCCTTCTTGAGATTCACAGCAATCAAACATCACTGGGCCTCATCAATAGAT  
GGGGTCCGTGGGGAAGAAGGAGGCTATGGAAATAATAAAAAAGTTCAAGAAAGACCTTGCTGCCATGTTGAGAA  
TTATCAATGCTAGGAAGGAGAGGAAGAGACGTGGCGCTGACACCAGCATCGGAATCGTCGGCCTCCTGTGTACCA  
GACCATGGCAGCCGATCACTAGACGTGGGATGCATACTACTACTGACTTGGACAGGAGCAGTGTGGTAAAGG  
CCATTTCTTTTGCCACCACATTTGGGGTGAACAAATGCCATGTACAGATCATGGACCTCGGGCACATGTGTGACGC  
CACCATGAGTTATGAGTGCCCCATGCTAGACGAGGGAGTGGAGCCAGATGACGTCGATTGCTGGTGCAACACGAC  
ATCGACTTGGGTTGTGTACGGAACCTGTCATCATAAAAAAGGTGAAGCACGACGATCCAGAAGAGCCGTGACGCTT  
CCTTCTCACTCCACGAGGAAGCTGCAACGCGATCGCAGACTTGGCTAGAGTCAAGAGAATACACAAAGCACCTG  
ATCAAGGTTGAAAATTGGATATTCAGGAACCCCGGGTTTTGCGCTAGTGGCTGTAGCTATAGCCTGGCTCCTGGGAA  
GCTCGACGAGCCAAAAGTTATATACTTGGTCATGATATTGTTGATTGCCCGGCATACAGCATTAGGTGCATAGG  
AGTTAGCAATAGAGACTTCGTGGAGGGCATGTCAGGTGGGACCTGGGTTGATGTTGTCTTGGAACATGGGGGTTGC  
GTCACCGTGATGGCACAGGACAAGCCAACAGTTGATATCGAGTTGGTACGACAACGGTTAGCAACATGGCCGAG  
GTAAGATCCTACTGCTATGAGGCATCAATATCGGACATGGCTTCGGACAGCCGTTGTCCAACACAAGGTGAAGCCT  
ACCTTGACAAGCAGTCAGACACTCAATATGTCTGCAAGAGAACATTGGTGGATAGAGGTTGGGAAAATGGGTGTG  
GACTTTTTGGCAAAGGGAGCTTGGTGACATGTGCCAAGTTTACGTGCTCCAAGAAAATGACAGGCAAGAGCATCCA  
GCCGGAGAACCTGGAGTACCGGATAATGCTATCAGTGCATGGATCCCAGCACAGTGGGATGATTGTGAATGACAC  
AGGACTGAAACTGACGAAAACAGAGCAAAAAGTCAGGTCACACCAATTACCAAGAGCAGAAGCAACCTTGG  
GAGGTTTTGGAAGCTTGGACTTGGACTGTGAACCAAGGACAGCCCTTGACTTCTCAGATCTGTATTACCTGACCAT  
GAACAATAAGCATTGGTTGGTGCACAAGGAGTGGTTTTCATGACATCCCATTTACCTTGGCATGCTGGTGCAGACACT  
GGAACTCCACACTGGAACAACAAGAGGCATTGGTGGAGTTCAAGGACGCCACGCCAAGAGGCAAACTGTTGTG  
GTTCTGGGGAGCCAAGAGGGAGCTGTTATACGGCCCTCGCTGGAGCTTTGGAGGCTGAGATGGATGGTGCAAAG  
GGAAGGCTATTCTCTGGCCATTTGAAATGCCCGCTAAAAATGGACAAGCTTAGGTTGAAGGGTGTGTCATATTCCC

TGTGTACCGCAGCGTTACATTTACCAAGGTCCCAGCTGAAACATTGCATGGAACAGTCACAGTGGAGGTGCAGTA  
TGCAGGGACAGACGGACCCTGCAAAGTCCCAGCCCAGATGGCGGTGGACATGCAGACCCTGACCCCAGTTGGAAG  
GCTGATAACCGCCAATCCTGTGATCACTGAAAAGTACTGAGAATTCAAAGATGATGTTGGAGCTCGACCCACCATT  
GGGGATTCTTACATTGTCATAGGAGTCGGGGACAAGAAAATCACCCATCACTGGCATCGGAGTGGTAGCACCATCG  
GAAAGGCATTTGAAGCCACTGTGAGAGGTGCCAAGAGAATGGCAGTCTTGGGGGACACAGCCTGGGACTTTGGAT  
CAGTTGGGGGTGTGTTAATTCATTGGGTAAGGGTATTCACCAGATCTTTGGAGCAGCTTCAAATCACTGTTTGA  
GGAATGTCCTGGTTCTCACAGATCCTCATAGGCACACTGTTGGTGTGGTTAGGTTTGAACACAAAAGAATGGATCTA  
TCTCCCTCACATGCTTAGCCCTGGGGGGAGTGATGATCTTCCCTTCCACGGCTGTTTCTGCTGATGTTGGGTGCTCG  
GTGGACTTCTCAAAAAAGGAAACGAGATGTGGCACGGGGGTGTTCTGCTACAATGACGTTGAAGCCTGGAGGGAC  
CGGTACAAGTACCATCCTGACTCCCCCGCAGATTGGCAGCAGCTGTTAAGCAGGCTTGGGAAGAGGGGATTTGTG  
GGATCTCCTCCGTTTCGAGAATGGAAAACATCATGTGGAAATCAGTGGAAAGGGGAGCTTAATGCAATCCTAGAGG  
AGAATGGAGTTCAACTGACAGTTGTAGTGGGGTCTGTAAAAAACCTATGTGGAGAGGTCCACAGAGATTGCCAGT  
GCCTGTGAATGAGCTGCCCCATGGCTGGAAAGCCTGGGGGAAATCGTACTTTGTCAGAGCAGCAAAGACCAACAA  
CAGTTTTGTTGTCGACGGTGACACACTGAAGGAGTGTCCGCTCAAACATAGAGCATGGAATAGCTTCTTGTGGAG  
GATCACGGGTTTGGGATCTTCCACACCAGTGTGGCTGAAGGTCAGAGAGGACTACTACTAGAGTGTGACCCAG  
CCGTCATAGGAACAGCTGTCAAGGGAAAGGAAGCTGCACACAGTGATCTAGGCTATTGGATTGAGAGTGAAAAGA  
ATGACACATGGAGGCTGAGGAGGGCTCATCTGATTGAGATGAAAACATGTGAGTGGCCAAAGTCTCACACACTGT  
GGACAGATGGAGTGGAAAGAAAGTGATCTGATCATACCCAAGTCCTTAGCTGGTCCACTCAGCCACCACAACACCA  
GAGAGGGTTACAGAATCAAGTGAAGGGCCATGGCATAGTGAAGAGCTCGAAATCCGGTTTGGAGAGTGCCCA  
GAACCAAGGTTACGTTGAGGAGACATGCGGAACTAGAGGACCATCTCTGAGATCAACTACTGCTAGTGGAAGG  
TCATAGAGGAATGGTGCTGC

## DAK-II

CACGTGGAGGAGACATGCGGAACTAGAGGACCATCTCTGAGATCAACTACTGCTAGTGGAAAGGGTCATAGAGGAA  
TGGTGCTGcAGGGAATGCACAATGCCTCCACTATCGTTCGGGGCAAAGACGGCTGCTGGTATGGAATGGAGATAA  
GGCCCAGAAAGGAACCAGAGAGCAACTTAGTGAGGTCCATGGTGACAGCAGGATCAACCGATCATATGGATCACT  
TCTCTCTGGAGTGCTGTGATTCTACTCATGGTGCAGGAAGGTTTGAAGAAGAGAATGACCACAAAAGATCATAAT  
GACACATCAATGCCAGTGTGGTAGCCATGGTCTGGGAGGATTCTCAATGAGTGACCTGGCTAAGCTTGTGATC  
CTGATGGGTGCTACTTTCGCAGAAATGAACACTGGAGGAGATGTAGTCACTTGGCATTGGTTGCGGCATTTAAAG  
TCAGACCAGCCTTGTGGTTTCCCTCATCTCAGAGCCAACTGGACACCCCGTGAGAGCATGCTGCTAGCCCTGGCT  
TCGTGCCTCCTGCAGACTGCGATCTCTGCTCTTGAAGGCGAGCTGATGGTCCCTCGTTAATGGATTGTCTTTGGCCTG  
GTTGGCAATACGAGCAATGGCCGTGCCACGCACTGACAATATCGCTCTGGCAATTCTGGCTGCTCTAACACCATTA  
GCCAGAGGCACACTGCTCGTGGCATGGAGAGCGGGCTCGCCACTTGTGGAGGGTTCATGCTCCTTTCCCTGAAAG  
GGAAAGGTAGTGTGAAGAAGAACCTGCCTTTTGTGATGGCCTTGGGGTTGACCCTGTGAGGATAGTGACCCCAT  
CAATGTGGTAGGACTACTGTTACTACAAGGAGTGGAAAACGGAGCTGGCCTCCTAGTGAAGTGCTTACAGCTGTT  
GGCCTGATATGTGACTGGCCGGAGGGTTTGGCAAGGCAGACATAGAGATGGCTGGGCCATGGCTGCAGTGGGC  
CTGCTAATTGTGAGTTATGTGGTCTCGGGAAAGAGTGTGGACATGTACATCGAAAGAGCAGGTGATATCATGAGG  
AAAAAGACGCGGAAGTCACTGGAAACAGTCTCGGCTTGACGTGGCACTAGATGAGAGTGGTGATTTCTCCTTGGT  
AGAGGAGGATGGCCCACCATGAGAGAGATCATACTCAAGGTGGTTCGATGGCCATCTGTGGCATGAACCCAAT  
AGCCATAACCTTCGCTGCAGGAGCGTGGTATGTGTATGTAAAGACTGGAAAAAGGAGTGGTGGCCCTCTGGGACGTG  
CCTGCTCCCAAAGAAGTGAAAAAAGGAGAGACTACAGATGGAGTGTACAGAGTGTGACTCGCAGACTGCTGGGT  
TCAACACAGGTTGGAGTGGGAGTCATGCAAGAGGGAGTCTTCCACACCATGTGGCACGTCACAAAAGGAGCCGCA  
TTGAGGAGCGGTGAAGGAAGACTTGATCCATATTGGGGGGACGTC AAGCAGGACTTGGTGTGATATTGTGGCCCT  
GGAAGTTGGATGCAGCCTGGGATGGACTAAGTGAAGTGCAGCTTTTGGCCGTACCCCCGAGAGAGGGCTAGAA  
ACATTCACTCTGCCTGGAATATTCAAGACAAAGGATGGGGACATCGGAGCAGTCTGCTCTAGACTACCCCGCAGG  
AACCTCAGGATCTCCAATCCTAGACAAAATGCGGAAGAGTGATAGGACTTTATGGCAATGGGGTTGTGATCAAGAAT  
GGAAGCTATGTTAGTGCCATAACCCAGGGAAAAAGGGAGGAGGAGGCTCCAGTTGAGTGTCTTGAACCCCTCGATG  
CTGAGGAAGAAGCAGCTAACAGTCTTGGATCTGCATCCAGGAGCCGGGAAAACCAGGAGGGTTCTTCTGAAATA  
GTCCGTGAAGCCATAAAGAAGAGACTTCGCACAGTGATCCTAGCACCAACCAGGGTCGTTGCTGCTGAGATGGAG  
GAAGCCCTAAGAGGACTGCCGGTGCCTTACATGACAACAGCAGTCAACGTCACCCACTCTGGGACAGAAATCGTC  
GATTTGATGTGCCATGCCACCTTCACTTACGCCTACTACAACCCATCAGAGTCCCCAACTACAACCTTTACATCAT  
GGATGAAGCTCATTTACAGATCCCTCAAGCATAGCTGCACGAGGATATATATCAACAAGGGTTGAAATGGGCGA  
GGCGGTGCTATCTTATGACTGCTACACCACCAGGAACCCGCGATGCGTTTCCGGATTCCAACCTACCAATCATG  
GACACAGAAGTGGAAAGTTCAGAGAGAGCCTGGAGCTCAGGCTTTGACTGGGTGACGGATCATTCTGGGAAAAACA  
ATTTGGTTTGTTC AAGTGTGAGAAACGGAAATGAAATCGCAGCCTGTCTGACAAAAGGCTGGAAAGCGGGTCATA  
AGCTCAGCAGGAAGACTTTTGGACAGAGTTT CAGAAGACAAAAAATCAAGAGTGGGACTTTGTGATAACAACCTG  
ACATTTCAAGAGATGGGTGCCAATTTCAAGGCTGACCGGGTCATAGATTCCAGGAGATGCCTAAAGCCAGTCACT

CGATGGCGAGAGAGTCATCCTGGCTGGGCCCATGCCTGTCACGCATGCCAGTGCTGCTCAGAGGAGAGGACGTATA  
GGCAGGAACCCCAACAAACCTGGAGATGAGTACATGTATGGAGGTGGGTGTGCAGAGACTGATGAAGACCATGCA  
CACTGGCTTGAAGCAAGAATGCTTCTTGACAACATTTACCTCCAGGATGGCCTCATAGCCTCGCTCTATCGGCCTGA  
GGCCGACAAGGTAGCCGCCATTGAGGGAGAGTTCAAGCTGAGGACAGAGCAAAGGAAGACCTTTGTGGAACATCAT  
GAAGAGAGGAGACCTTCCCGTTTGGCTGGCCTATCAAGTAGCATCTGCCGGAATAACTTACACAGATAGAAGATGG  
TGCTTTGATGGCACTACCAACAACACCATAATGGAAGACAGTGTACCAGCAGAGGTGTGGACCAAGTATGGAGAG  
AAGAGAGTGTAAACCGAGGTGGATGGATGCTAGGGTCTGTTTCAGATCATGCGGCTCTGAAGTCGTTCAAAGAAT  
TTGCCGCTGGGAAGAGAGGAGCGGCTTTGGGAGTAATGGATGCCCTGGGAACATTGCCAGGACACATGACAGAGA  
GGTTTCAGGAAGCCATTGACAATCTCGCTGTGCTCATGCGAGCAGAGACTGGAAGTAGGCCCTACAAAGCAGCGG  
CAGCTCAACTGCCGGAGACCTTAGAGACTATCATGCTTCTGGGCTTATTGGGAACAGTTTCGCTAGGAATCTTCTTT  
GTCTTGATGCGGAACAAGGGCATCGGGAAGATGGGCTTCGGAATGGTAACCCTGGGGCCAGCGCATGGCTCATGT  
GGCTTTCGGAATTGAACCAGCCAGAATCGCATGTGTCCTCATTGTCGTGTTTTTTGTTGCTGGTGGTGCTCATACC  
GAGCCAGAGAAGCAAAGATCTCCCCAGGATAATCAAATGGCAATCATCATGTTGGCAGTTGGCCTTCTGGGTT  
TGATAACTGCAAATGAACTCGGATGGCTGGAAAGGACAAAAAGTGATATAGCTCATCTAATGGGAAGGAAAGAAG  
AGGGGACAACCATGGGATTCTCAATGGATATTGATCTGCGGCCAGCCTCCGCTGGGCTATTTATGCCGATTGAC  
AACTCTCATACCCAGCCGTCCAACATGCGGTAACCACCTCATACAACAATACTCCCTGATGGCGATGGCCACA  
CAAGCTGGAGTGCTGTTTGGCATGGGCAAAGGGATGCCATTTTATGCATGGGACTTTGGAGTCCCCTGCTAATGA  
TGGGTTGCTACTCACAATTAACACCCTGACCCTGATAGTGGCCATCATTCTGCTTGTGGCACACTACATGTACTTG  
ATCCCAGGTTTGCAGGCAGCAGCAGC<sub>g</sub>CGTGCTGCCAGAAGAGGACAGCAGCTGGCATCATGAAGAATCCCCTTG  
TGGATGGAATAGTGGTGAAGTACATTGACACAATGACAATTGACCCCCAAGTGGAGAAGAAGATGGGACAAGTGT  
TACTCATAGCAGTAGCTGTCTCCAGTGTGTGCTACTGCGGACCGCTTGGGGATGGGGGAGGCTGGGGCTCTGAT  
CACAGCAGCAACCTCCACCTTATGGGAAGGCTCTCCAAACAAGTACTGGAACCTCTCCACAGCCACCTCACTGTGC  
AACATCTTTAGAGGAAGTTATTTGGCAGGGGCTTCCCTTATTTACAC

### DAK-III

GTACTGGAACCTCCACAGCCACCTCACTGTGCAACATCTTTAGAGGAAGTTATTTGGCAGGGGCTTCCCTTATTT  
ACACAGTGACAAGAAATGCCGGTCTGGTTAAGAGACGTGGAGGTGGAACGGGAGAGACCCTGGGAGAGAAGTGG  
AAAGCCCGCTGAACCAGATGTCGGCCTTGGAGTTCTACTCTTACAAAAAGTCAGGCATCACCGAAGTGTGTAGGG  
AGGAGGCGCGCCGCGCCCTCAAGGATGGAGTGGCCACAGGAGGACATGCTGTATCCCGGGGAAGCGCAAAGCTTA  
GATGGTTGGTAGAGAGAGGATACCTGCAGCCCCATGGAAAGTTGTTGACCTTGGATGTGGCAGAGGAGGCTGGA  
GTTATTACGCTGCCACCATCCGTAAGTGCAGGAGGTCAGAGGATACACAAAGGGAGGTCCTGGCCATGAAGAGC  
CCATGCTGGTCAAAGCTATGGGTGGAACATAGTTCGCCTCAAGAGTGGAGTGGACGCTTCCACATGGCGGCTGA  
ACCGTGTGACACTCTGCTGTGTGACATAGGCGAGTCATCCTCAGTCTGAAGTGAAGAGACGCGAACACTCAGA  
GTGCTCTCCATGGTGGGAGACTGGCTTGAAAAAGACCAGGGGCTTCTGCATAAAGGTGCTGTGCCCATACACCA  
GCACAATGATGGAGACCATGGAGCGACTGCAACGTAGGCATGGGGGAGGATTAGTCAGAGTGCCATTGTCCC  
ACTCTACACATGAGATGTATTGGGTCTCTGGAGCCAAAAGTAACATCATAAAGAGTGTGTCCACCACAAGTCAGCT  
CCTCTGGGACGCATGGAAGGGCTAGGAGGCCAGTGAATATGAGGAGGATGTGAACCTCGGCTCAGGCACACG  
AGCTGTGGCAAGCTGCGCTGAGGCTCCCAACATGAAGATCATTGGTAGGCGCATTGAGAGAATCCGCAATGAACA  
TGCAGAGACATGGTTCTTTGATGAAAACCCACCATACAGGACATGGCCCTACCATGGGAGCTACGAAGCCCCACG  
CAGGGGTCAGGCTATCCCTCGTGAACGGGTTGTTAGACTCTTGTCAAAAGCCCTGGGATGTGGTGAAGTTA  
CAGGAATAGCTATGACTGACACCACCCATACGGCCAACAAAGAGTCTTCAAGGAAAAAGTGGACACCAGGGTGC  
CAGATCCCCAAGAAGGCACTCGCCAAGTATGAACATGGTATCGTCTTGGTTATGGAAGGAGCTGGGAAAACGCA  
AGCGGCCACGTGTCTGCACCAAAGAAGAGTTCATTAATAAGGTGCGCAGCAATGCAGCACTGGGAGCAATATTTG  
AAGAGGAAAAAGAATGGAAGACAGCTGTAGAAGCTGTGAATGATCCAAGATTTTGGGCTCTAGTGGACAAGGAAA  
GAGAACACCACCTGAGAGGAGAGTGTATAGCTGTGTGTACAACATGATGGGCAAAGAGAAAAAGAAGCAAGGA  
GAATTCGGGAAAGCAAAGGCAGCCGTGCAATCTGGTACATGTGGTTGGGAGCCAGATTTTGGAGTTTGAAGCTC  
TTGGGTTCTTGAACGAGGACCCTGGATGGGGAGAGAAAACCTCAGGAGGTGGCGTTGAAGGGCTAGGACTGCAA  
GGCTTGATATATCCTAGAAGAAATGAACCGGGCACCAGGAGAAAGATGTATGCAGATGACACTGCTGGCTGGG  
ACACCCGCATTAGCAAGTTTGTATAGAGAATGAAGCCCTGATCACTAACAGATGGAAGAAGGGCACAGAGCTC  
TGGCGTTGGCCGTGATTAATAACACATACCAAAAACAAAGTGGTGAAGGTTCTCAGACCAGCTGAAGGAGGGAAAA  
CAGTCATGGACATCATCTCAAGACAAGACCAGAGAGGGAGCGGACAAGTTGTTACTTATGCTCTCAACACATTAC  
CAACCTGGTGGTGCAGCTTATCCGGAACATGGAGGCTGAGGAAGTGTAGAGATGCATGATCTGTGGTTGTTGAGG  
AAGCCAGAGAAAGTACCAGATGGTTGCAGAGCAATGGATGGGACAGACTCAAACCGATGGCAATTAGTGGAGAT  
GACTCGCTTGAAGGCAATTGATGATAGGTTGACATGCCCTCAGGTTCTTGAATGACATGGGAAAGGTTAGGA  
AAGACACACAGAAATGGAACCCCTCGACTGGATGGAGCAATTGGGAAGAGGTCCTCGTTCTGTTCTCACCCTCAA  
CAAGCTGCACCTCAAGGACGGGAGATCCATTGTGGTCCCCTGCCGCCACCAAGATGAACTGATTGGCCGAGCCCGT  
GTCTACCAGGGGACAGGATGGAGCATCCGGGAGACTGCTTGTCTTGA AAAATCATATGCACAGATGTGGCAGCTTC  
TTTATTTCCACAGAAGAGACCTCCGACTGATGGCCAATGCCATTTGTTCCGCTGTGCCAATTGACTGGGTACCAACT

GGGAGAACCACCTGGTCAATCCATGGAAAGGGAGAATGGATGACTACTGAGGACATGCTCATGGTGTGGAATAGA  
GTGTGGATTGAGGAGAACGACCACATGGAGGACAAGACCCCTGTAACAAAATGGACAGACATTCCCTATTTGGGA  
AAAAGGGAGGACTTATGGTGTGGATCCCTTATAGGGCATAGACCTCGCACCACTTTGGGCTGAGAACATCAAAGAC  
ACAGTCAACATGGTGCCTAGGATCATAGGTGATGAAGAAAAGTTTCATGGACTACCTATCCACCCAAGTACGCTACT  
TGGGTGAGGAAGGGTCCACACCTGGAGTGTCTGTAAGCATCAATTTCAATGTTGTTCAGGCCTGCTAGTCAGCCACAG  
TTTGGGGAAAGCTGTGCAGCCTGTAACCCCCCAGGAGAAGCTGGGAAACCAAGCTCATAGTCAGGCCGATAACG  
CCATGGCACGGAAAAAGCCATGCTGCCCTGTGAGCCCCCAGAGGACACTGAGTCAAAAAACCCACGGCCTTGGGA  
AGCGCAGGATGGGAAAAGAAGGTGGCGACCTTCCCCACCTTTAATCTGGGGCCTGAACTGGAGATTAGCTGTGA  
ATCTCCAGCAGAAGGACTAGTGGTTAGAGGAGACCCCCCGAAAAACGCAAAACAGCATATTGACGCTGGGAAAAGA  
CCAGAGACTCCATGAGTTTCCACCACGCTGGCCGCCAGGCACAGATCGCCGAACAGCGGCGGCCGGTGTGGGGAA  
ATCCATGGGTCTGGCCGGCATGGTCCAGCCTCCTCGCTGGCGCCGGCTGGGCAACATTCCGAGGGGACCGTCCCC  
TCGGTAATGGCGAATGGGACTCGCGACAGACATGATAAGATACATTGATGAGTTTGGACAAACCACAATAAGAT  
GCAGTGAAAAAAATGCTTTATTTGTGAAATTAAGCGCTGGCATTGACCCTGAG

## MART-II

GAAACATGTGGAACAAGAGGACCATCTCTGAGATCAACCACTGCAAGCGGAAGGGTGTATCGAGGAATGGTGTCTGC  
AGGGAGTGCACAATGCCCCACTGTCGTTCTGGGCTAAAGATGGCTGTTGGTATGGAATGGAGATAAGGCCCAGG  
AAAGAACCAGAAAGCAACTTAGTAAGGTCAATGGTACTGCAGGATCAACTGATCAGATGGATCACTTCTCCCTTG  
GAGTGTCTGTGATTCTGCTCATGGTGCAGGAAGGGCTGAAGAAGAGAATGACCACAAAGATCATATAAGCACAT  
CAATGGCAGTGTGGTAGCTATGATCCTGGGAGGATTTTCAATGAGTGACCTGGCTAAGCTTGCAATTTTGTATGGG  
TGCCACCTTCGCGGAAATGAACTGAGGAGATGTAGCTCATCTGGCGCTGACAGCGGCATTCAAAGTCAGACCA  
GCGTTGCTGGTATCTTTCATCTTCAGAGCTAATTGGACACCCCGTGAAGCATGCTGCTGGCCTTGGCCTCGTGTCT  
TTTGCAAATGCGATCTCTGCCTTGAAGGGCAGCTGATGGTTCTCATCAATGGTTTTGCTTTGGCCTGGTTGGCAA  
TACGAGCGATGGTTGTTCCACGCACTGACAACATCACCTTGGCAATCCTGGCTGCTCTGACACCACTGGCCCCGGG  
CACACTCTTGTGGCTGGAGAGCAGGCCTTGCTACTTGCAGGGGTTTATGCTCCTCTCTGAAGGAAAAGGC  
AGTGTGAAGAAGAACTTACCATTGTTCATGGCCCTGGGACTAACCGCTGTGAGGCTGGTTCGACCCCATCAACGTGG  
TGGGACTGCTGTTGCTACAAGGAGTGGGAAGCGGAGCTGGCCCCCTAGCGAAGTACTCACAGCTGTTGGCCTGAT  
ATGTGCATTGGCTGGAGGGTTTCGCAAGGCAGATATAGAGATGGCTGGGCCCATGGCCGCGGTTCGGTCTGCTAATT  
GTCAGTTACGTGGTCTCAGGAAAGAGTGTGGACATGTACATTGAAAGAGCAGGTGACATCACATGGGAAAAAGAT  
GCGGAAGTCACTGGAACAGTCCCCGGCTCGACGTGGCGCTAGATGAGAGTGGTGATTTCTCCCTGGTGGAGGATG  
ACGGTCCCCCATGAGAGAGATCATACTCAAGGTGGTCTGATGACCATCTGTGGCATGAACCAATAGCCATACC  
CTTTCAGCTGGAGCGTGGTACGTATACGTGAAGACTGGA AAAAAGGAGTGGTGCTCTATGGGATGTGCCTGCTCCC  
AAGGAAGTAAAAAAGGGGGAGACCACAGATGGAGTGTACAGAGTAATGACTCGTAGACTGCTAGGTTCAACACAA  
GTTGGAGTGGGAGTTATGCAAGAGGGGGTCTTTCACACTATGTGGCACGTCACAAAAGGATCCGCGCTGAGAAGC  
GGTGAAGGGAGACTTGATCCATACTGGGGAGATGTCAAGCAGGATCTGGTGTACATACTGGTCCATGGAAGCTAG  
ATGCCGCTGGGACGGGCACAGCGAGGTGCAGCTCTTGGCCGTGCCCCCGGAGAGAGAGCGAGGAACATCCAGA  
CTCTGCCCGGAATATTTAAGACAAAGGATGGGGACATTGGAGCGGTTGCGCTGGATTACCCAGCAGGAACCTCAGG  
ATCTCCAATCCTAGACAAGTGTGGGAGAGTGTAGGACTTTATGGCAATGGGGTCTGATCAAAAATGGGAGTTAT  
GTTAGTGCCATCACCAAGGGAGGAGGAGAGACTCCTGTGAGTGTTCGAGCCTTCGATGCTGAAGAAG  
AAGCAGTCAACTCTTAGACTTGCATCCTGGAGCTGGGAAAACCAGGAGATTCTTCTGAAATAGTCCGTGAAG  
CCATAAAAAAAGACTCCGTAAGTGTGATCTTAGCTCCAACCAGGGTTGTCGCTGCTGAAATGGAGGAAGCCCTTAG  
AGGGCTTCCAGTGCCTTATATGACAACAGCAGTCAATGTACCCACTCTGGAACAGAAAATCGTCGACTTAATGTGC  
CATGCCACCTTCACTTACGCTACTACAGCCAATCAGAGTCCCCAACTATAATCTGTATATTATGGATGAGGCCCA  
CTTACAGATCCCTCAAGTATAGCAGCAAGAGGATACATTTCAACAAGGGTTGAGATGGGCGAGGCGGCTGCCATC  
TTCATGACCGCCACGCCACCAGGAACCCGTGACGCATTTCCGGACTCCAACCTACCAATTATGGACACCGAAGTGG  
AAGTCCCAGAGAGAGCCTGGAGCTCAGGCTTTGATTGGGTGACGGATCATTCTGGAAAACAGTTTGGTTTGTTC  
AAGCGTGAGGAACGGCAATGAGATCGCAGCTTGTCTGACAAAGGCTGGAAAACGGGTCATACAGCTCAGCAGAAA  
GACTTTTGAGACAGAGTTCCAGAAAACAAAACATCAAGAGTGGGACTTTGTCTGACAACTGACATTTTCAGAGATG  
GGCGCAACTTTAAAGCTGACCGTGTATAGATTCCAGGAGATGCCTAAAGCCGGTCATACTTGATGGCGAGAGAG  
TCATTTCTGGCTGGACCCATGCCTGTACACATGCCAGCGCTGCCAGAGGAGGGGGCGCATAGGCAGGAATCCCAA  
TAAACCTGGAGATGAGTATCTGTATGGAGTGGGTGCGCAGAGACTGACGAAGACCATGCACACTGGCTTGAAGC  
AAGAATGCTCCTTGACAATATTTACCTCCAAGATGGCCTCATAGCTCGCTCTATCGACCTGAGGCCGACAAAGTA  
GCAGCCATTGAGGGAGAGTTCAAGCTTAGGACGGGAAAAGAACCTTTGTGGAACATGAAAAGAGGAGAT  
CTTCTGTTTGGCTGCCTATCAGGTTGCATCTGCCGGAATAACCTACACAGATAGAAGATGGTCTTTGATGGCAC  
GACCAACAACACATAATGGAAGACAGTGTGCCGGCAGAGGTGTGGACCAGACACGGAGAGAAAAGAGTGTCTCA  
AACCGAGGTGGATGGACGCCAGAGTTTGTTCAGATCATGCGGCCCTGAAGTCATTCAAGGAGTTTGGCGCTGGGAA  
AAGAGGAGCGGCTTTTGGAGTGTGGAAGCCCTGGGAAACTGCCAGGACACATGACAGAGAGATTCCAGGAAGC  
CATTGACAACCTCGCTGTGCTCATGCGGGCAGAGACTGGAAGCAGGCCTTACAAAAGCCGCGGGCCCAATTGCCG



GAGACCCTAGAGACCATTATGCTTTTGGGGTTGCTGGGAACAGTCTCGCTGGGAATCTTTTTTCGTCTTGATGAGGAA  
CAAGGGCATAGGGAAGATGGGCTTTGGAATGGTGACTCTTGGGGCCAGCGCATGGCTCATGTGGCTCTCGGAAATT  
GAGCCAGCCAGAATTGCATGTGTCCCTCATTGTTGTGTTCTATTGCTGGTGGTGCTCATACTGAGCCAGAAAAGCA  
AAGATCTCCCCAGGACAACCAAATGGCAATCATCATCATGGTAGCAGTAGGTCTTCTGGGCTTGATTACCGCCAAT  
GAACTCGGATGGTTGGAGAGAACAAGAGTGACCTAAGCCATCTAATGGGAAGGAGAGAGGAGGGGGGCAACCAT  
AGGATTCTCAATGGACATTGACCTGCGGCCAGCCTCAGCTTGGGCCATCTATGCTGCCTTGACAACTTTCATTACCC  
CAGCCGTCCAACATGCAGTGACCACTTCATAACAACAATACTCCTTAATGGCGATGGCCACGCAAGCTGGAGTGTT  
GTTTGGTATGGGCAAAGGGATGCCATTCTACGCATGGGACTTTGGAGTCCCCTGCTAATGATAGGTTGCTACTCA  
CAATTAACACCCCTGACCCTAATAGTGGCCATCATTTTGCTCGTGGCGCACTACATGTACTTGATCCCAGGGCTGCA  
GGCAGCAGCTGCGCGTGCTGCCAGAGAAGAGAACGGCAGCTGGCATCATGAAGAACCCTGTTGTGGATGGAATAGT  
GGTGACTGACATTGACACAATGACAATTGACCCCAAGTGGAGAAAAAGATGGGACAGGTGCTACTCATAGCAGT  
AGCCGTCTCCAGCGCCATACTGTCGCGGACCGCCTGGGGGTGGGGGGAGGCTGGGGCCCTGATCACAGCCGCAAC  
TTCCACTTTGTGGGAAGGCTCTCCGAACAAGTACTGGAACCTCTACAGCCACTTCACTGTGTAACATTTTTAGGG  
GAAGTTACTTGGCTGGAGCTTC
